# Supplementary material for: Phytochemical Composition of Different Botanical Parts of Morus Species, Health Benefits and Application in Food Industry
Source: MDPI journal article supplement (doi:10.3390/plants11020152), 2022-01-06
Supplement: s1 [file s1]

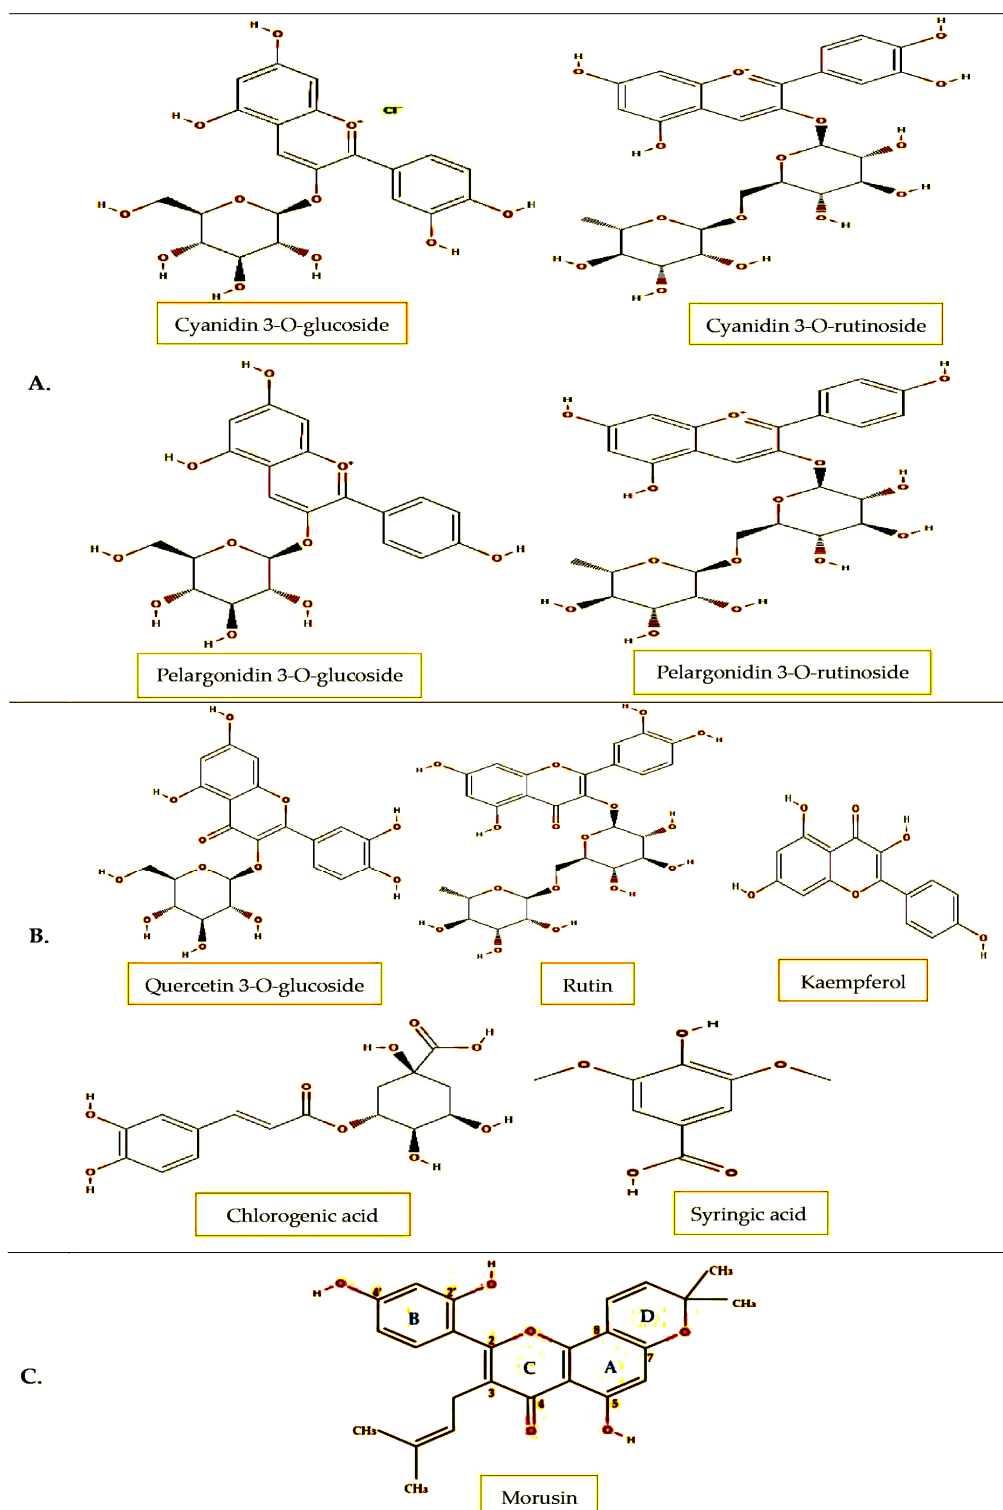

**Figure S1.** (A). The chemical structures of the four main anthocyanins identified in black mulberry fruit. (B). Chemical structure of the main flavonols and phenolic acids identified in mulberry's fruit and leaves. (C). The chemical structure of morusin. The chemical structure of phenols was generated using the molview.org program.
